# Supplementary material for: Crystal structure of ErmE - 23S rRNA methyltransferase in macrolide resistance
Source: PubMed Central journal article supplement (PMC6787224; doi:10.1038/s41598-019-51174-0), 2019-10-10
Supplement: 41598_2019_51174_MOESM1_ESM.pdf [file 41598_2019_51174_MOESM1_ESM.pdf]

**Supplemental material for**

**Crystal structure of ErmE - 23S rRNA methyltransferase in macrolide resistance**

**Alena Stsiapanava\* and Maria Selmer\***

Department of Cell and Molecular Biology, Uppsala University, BMC, Box 596, SE-751 24  
Uppsala, Sweden

\* to whom correspondence should be addressed: [alena.stsiapanava@gmail.com](mailto:alena.stsiapanava@gmail.com) or  
[maria.selmer@icm.uu.se](mailto:maria.selmer@icm.uu.se)

**Content: Supplementary Table S1**  
**Supplementary Figure S1-S2**

## Supplementary Table S1

Details of protein expression constructs

|                              | <b>PikR1 (UniProt ID: Q9ZGI6)</b>                                                                                                                                                                                                                                                                                                                                                                                   | <b>PikR1 truncated</b>                                                                                                                                                                                                                                                                                                              |
|------------------------------|---------------------------------------------------------------------------------------------------------------------------------------------------------------------------------------------------------------------------------------------------------------------------------------------------------------------------------------------------------------------------------------------------------------------|-------------------------------------------------------------------------------------------------------------------------------------------------------------------------------------------------------------------------------------------------------------------------------------------------------------------------------------|
| Source organism              | <i>S. venezuelae</i> strain ATCC 15439                                                                                                                                                                                                                                                                                                                                                                              |                                                                                                                                                                                                                                                                                                                                     |
| Expression vector            | pET-24a(+)                                                                                                                                                                                                                                                                                                                                                                                                          |                                                                                                                                                                                                                                                                                                                                     |
| Expression host              | <i>E. coli</i> BL21(AI)                                                                                                                                                                                                                                                                                                                                                                                             |                                                                                                                                                                                                                                                                                                                                     |
| Complete amino-acid sequence | MHHHHHHHHMAMRDSIPRRAD<br>RDTLRRELGQNFLQDDRAVRNL<br>VTHVEGDGRNVLEIGPGKGAITE<br>ELVRSFDTVTVVEMDPHWAAHV<br>RRKFEGERVTVFQGDFLDFRIPR<br>DIDTVVGNVPGITTQILRSLLES<br>TNWQSAALIVQWEVARKRAGRS<br>GGSLTTSWAPWYEFVHDRV<br>ASSFRPMPRV DGGVLTIRRRPQP<br>LLPESASRAFQNF AEAVFTGPGR<br>GLAEILRRHIPKRTYRSLADRHGI<br>PDGGLPKDLTLTQWIALFQASQP<br>SYAPGAPGTRMPGQGGGAGGRD<br>YDSETSRAAVPGSRRYGPTRGGE<br>PCAPRAQVRQTKGRQGARGSSY<br>GRRTGR | MHHHHHHHHMAMRDSIPRRAD<br>RDTLRRELGQNFLQDDRAVRNL<br>VTHVEGDGRNVLEIGPGKGAITE<br>ELVRSFDTVTVVEMDPHWAAHV<br>RRKFEGERVTVFQGDFLDFRIPR<br>DIDTVVGNVPGITTQILRSLLES<br>TNWQSAALIVQWEVARKRAGRS<br>GGSLTTSWAPWYEFVHDRV<br>ASSFRPMPRV DGGVLTIRRRPQP<br>LLPESASRAFQNF AEAVFTGPGR<br>GLAEILRRHIPKRTYRSLADRHGI<br>PDGGLPKDLTLTQWIALFQASQP<br>SYALE |
|                              | <b>PikR2 (UniProt ID: Q9ZGI7)</b>                                                                                                                                                                                                                                                                                                                                                                                   | <b>PikR2 truncated</b>                                                                                                                                                                                                                                                                                                              |
| Source organism              | <i>S. venezuelae</i> strain ATCC 15439                                                                                                                                                                                                                                                                                                                                                                              |                                                                                                                                                                                                                                                                                                                                     |
| Expression vector            | pET-24a(+)                                                                                                                                                                                                                                                                                                                                                                                                          |                                                                                                                                                                                                                                                                                                                                     |
| Expression host              | <i>E. coli</i> BL21(AI)                                                                                                                                                                                                                                                                                                                                                                                             |                                                                                                                                                                                                                                                                                                                                     |
| Complete amino-acid sequence | MHHHHHHHHMAFSPQGGRHEL<br>GQNFLVDRSVIDEIDGLVARTKG<br>PILEIGPGDGALTLPLSRHGRPITA<br>VELDGRRAQRLGARTPGHVTVV<br>HHDFLQYPLPRNPHVVVGNVVPF<br>HLTTAIMRRLLLDAQHWHTAVLL<br>VQWEVARRRAGVGGSTLLTAG<br>WAPWYEFDLHSRVPARAFRMP<br>GVDGGVLAIRRRSAPLVGQVKT                                                                                                                                                                           | MHHHHHHHHMAFSPQGGRHEL<br>GQNFLVDRSVIDEIDGLVARTKG<br>PILEIGPGDGALTLPLSRHGRPITA<br>VELDGRRAQRLGARTPGHVTVV<br>HHDFLQYPLPRNPHVVVGNVVPF<br>HLTTAIMRRLLLDAQHWHTAVLL<br>VQWEVARRRAGVGGSTLLTAG<br>WAPWYEFDLHSRVPARAFRMP<br>GVDGGVLAIRRRSAPLVGQVKT                                                                                           |

|                         |                         |
|-------------------------|-------------------------|
| YQDFVRQVFTGKGNGLKEILRRT | YQDFVRQVFTGKGNGLKEILRRT |
| GRISQRDLATWLRNEISPHALP  | GRISQRDLATWLRNEISPHALP  |
| KDLKPGQWASLWELTGGTADGS  | KDLKPGQWASLWELTGGTADGS  |
| FDGTAGGGAAGSHGAARVGAG   | LE                      |
| HPGGRVSASRRGVPQARRGRGH  |                         |
| AVRSSTGTEPRWGRGRAESA    |                         |

|                              | <b>ErmE (UniProt ID: P07287)</b>                                                                                                                                                                                                                                                                                                                                                                                                                                   | <b>ErmE truncated</b>                                                                                                                                                                                                                                                                                                                                      |
|------------------------------|--------------------------------------------------------------------------------------------------------------------------------------------------------------------------------------------------------------------------------------------------------------------------------------------------------------------------------------------------------------------------------------------------------------------------------------------------------------------|------------------------------------------------------------------------------------------------------------------------------------------------------------------------------------------------------------------------------------------------------------------------------------------------------------------------------------------------------------|
| Source organism              | <i>S. erythraea</i>                                                                                                                                                                                                                                                                                                                                                                                                                                                |                                                                                                                                                                                                                                                                                                                                                            |
| Expression vector            | pET-24a(+)                                                                                                                                                                                                                                                                                                                                                                                                                                                         |                                                                                                                                                                                                                                                                                                                                                            |
| Expression host              | <i>E. coli</i> BL21(AI)                                                                                                                                                                                                                                                                                                                                                                                                                                            |                                                                                                                                                                                                                                                                                                                                                            |
| Complete amino-acid sequence | MHHHHHHHHMSSSDEQPRPRR<br>NQDRQHPNQNRPVLRTERDRN<br>RRQFGQNFLRDRKTIARIAETA<br>LRPDLPVLEAGPGEGLLTRELAD<br>RARQVTSYEIDPRLAKSLREKLS<br>GHPNIEVVNADFLTAEPPEPFAF<br>VGAIPYGITSAIVDWCLEAPTIE<br>ATMVTQLEFARKRTGDYGRWSR<br>LTVMTWPLFEWVFEKVDRRLF<br>KVPVKVDSAIMRLRRAEPLLEG<br>AALERYESMVELCFTGVGGNIQ<br>ASLLRKYPRRRVEAALDHAGVG<br>GGAVVAYVRPEQWLRLFERLDQ<br>KNEPRGGQPQRGRRTGGRDHGD<br>RRTGGQDRGDRRTGGRDHRDRQ<br>ASGHGDRSSGRNRDDGRTGER<br>EQGDQGGRRGPSGGGRTGGRPG<br>RRGGPGQR | MHHHHHHHHMSSSDEQPRPRR<br>NQDRQHPNQNRPVLRTERDRN<br>RRQFGQNFLRDRKTIARIAETA<br>LRPDLPVLEAGPGEGLLTRELAD<br>RARQVTSYEIDPRLAKSLREKLS<br>GHPNIEVVNADFLTAEPPEPFAF<br>VGAIPYGITSAIVDWCLEAPTIE<br>ATMVTQLEFARKRTGDYGRWSR<br>LTVMTWPLFEWVFEKVDRRLF<br>KVPVKVDSAIMRLRRAEPLLEG<br>AALERYESMVELCFTGVGGNIQ<br>ASLLRKYPRRRVEAALDHAGVG<br>GGAVVAYVRPEQWLRLFERLDQ<br>KNEPRLE |

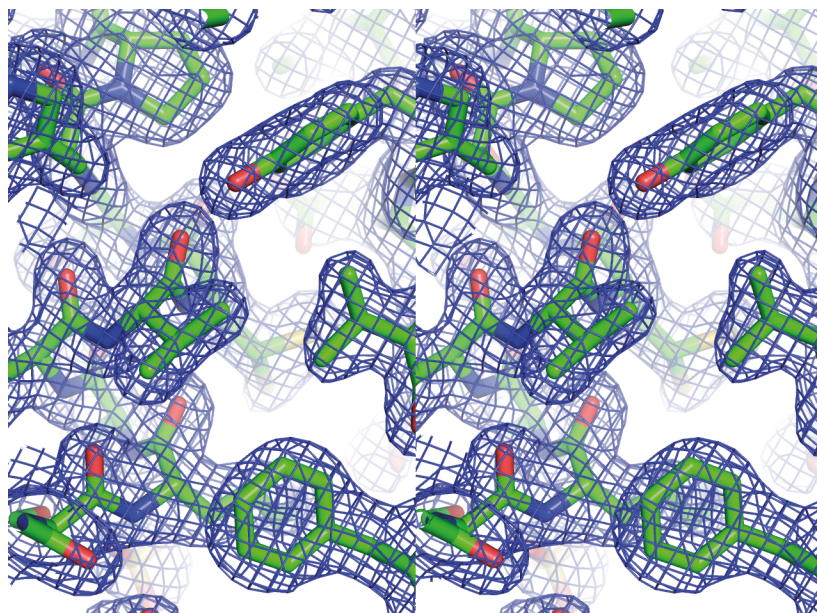

### Supplementary Figure S1

Walleye stereo map of ErmE (PDB ID 6NVM) is superimposed onto the corresponding atomic model, shown in stick representation.  $2mFo-DFc$  map is contoured at  $1.0 \sigma$  and centered around V177.

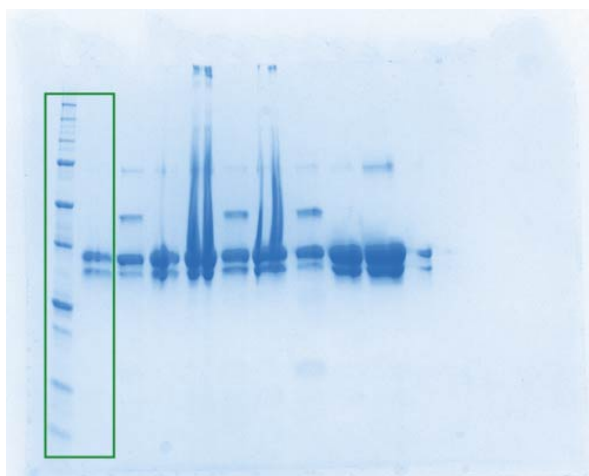

(a)

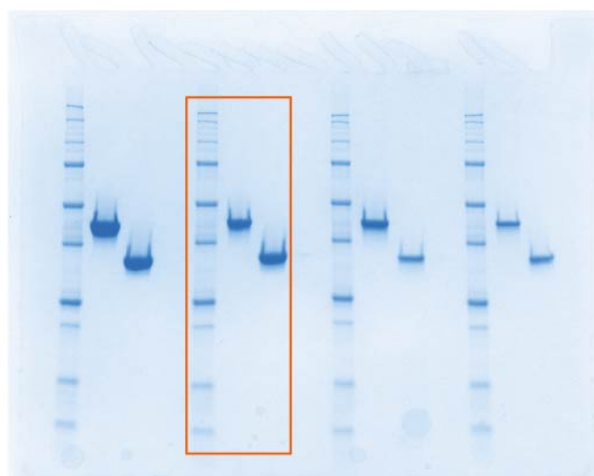

(b)

**Supplementary Figure S2**

Coomassie-stained SDS-PAGE. (a) PikR1 after HIC purification. (b) Full-length and truncated ErmE after SEC purification.
